# Supplementary material for: Photochemical-mediated solid-state [2+2]-cycloaddition reactions of an unsymmetrical dibenzylidene acetone (monothiophos-dba)
Source: Royal Society of Chemistry journal article supplement (doi:10.1039/c2ce25480h), 2012-01-01
Supplement: c2ce25480h.pdf [file c2ce25480h.pdf]

Electronic Supporting Information for:

**Photochemical-mediated solid-state [2+2]-cycloaddition reactions of an  
unsymmetrical dibenzylidene acetone (monothiophos-dba)**

Amanda G. Jarvis,<sup>a</sup> Hazel A. Sparkes,<sup>b\*</sup> Sarah E. Tallentire,<sup>b</sup> Lauren E. Hatcher,<sup>c</sup> Mark R. Warren,<sup>c</sup> Paul R. Raithby,<sup>c\*</sup> David R. Allan,<sup>d</sup> Adrian C. Whitwood,<sup>a</sup> Martin C. R. Cockett,<sup>a</sup> Simon B. Duckett,<sup>a</sup> Johnathan L. Clark<sup>a</sup> and Ian J. S. Fairlamb<sup>a\*</sup>

<sup>a</sup> Department of Chemistry, University of York, Heslington, York, YO10 5DD, UK. Fax: +44 (0)1904 322516;  
Tel: +44 (0)1904 324091; E-mail: [ian.fairlamb@york.ac.uk](mailto:ian.fairlamb@york.ac.uk)

<sup>b</sup> Department of Chemistry, Durham University, South Road, Durham, DH1 3LE, UK; E-mail:  
[h.a.sparkes@durham.ac.uk](mailto:h.a.sparkes@durham.ac.uk)

<sup>c</sup> Department of Chemistry, University of Bath, BATH BA2 7AY, UK. Fax: +44 (0)1225 386231; Tel: +44  
(0)1225 383183; E-mail: [p.r.raithby@bath.ac.uk](mailto:p.r.raithby@bath.ac.uk)

<sup>d</sup> Diamond Light Source Ltd, Diamond House, Harwell Science and Innovation Campus, Didcot, Oxfordshire  
OX11 0DE.

**Contents**

| Section | Title                                                                | Page |
|---------|----------------------------------------------------------------------|------|
| 1.      | General information                                                  | S2   |
| 2.      | Synthetic chemistry: experimental details for compounds 3 and 4      | S2   |
| 3.      | Photochemistry experiments                                           | S4   |
| 3.1     | Single crystal XRD experiments                                       | S4   |
| 3.2     | Two-photon irradiation experiments                                   | S8   |
| 3.3     | Powder XRD experiments                                               | S10  |
| 3.4     | Solid-state NMR spectroscopic experiments                            | S12  |
| 3.5     | Solution-state <i>in situ</i> laser NMR spectroscopic experiments    | S13  |
| 4.      | <sup>1</sup> H and <sup>13</sup> C NMR spectra for compounds 3 and 4 | S14  |
| 5.      | UV-vis spectroscopic data for compound 3                             | S20  |
| 6.      | References                                                           | S21  |

## 1. General information

NMR spectra were obtained in the solvent indicated, using a JEOL ECX400 or JEOL ECS400 spectrometer (400MHz for  $^1\text{H}$ , 100 MHz for  $^{13}\text{C}$  and 162 MHz for  $^{31}\text{P}$ ). Chemical shifts were referenced to the residual solvent of the deuterated solvent used ( $\text{CHCl}_3$   $\delta = 7.26$  and  $77.16$ ,  $\text{CDHCl}_2$   $\delta = 5.31$  and  $53.80$ ,  $^1\text{H}$  and  $^{13}\text{C}$  respectively). All  $^{13}\text{C}$  NMR spectra were obtained with  $^1\text{H}$  decoupling.  $^{31}\text{P}$  NMR spectra were externally referenced to 85%  $\text{H}_3\text{PO}_4$ , and obtained with  $^1\text{H}$  decoupling. For  $^{13}\text{C}$  NMR spectra the coupling constants are quoted to  $\pm 1$  Hz. For the  $^1\text{H}$  NMR spectra the resolution varies from  $\pm 0.15$  to  $\pm 0.5$  Hz; the coupling constants have been quoted to  $\pm 0.5$  Hz in all cases for consistency. NMR spectra were processed using MestreNova software. Melting points were recorded using a Stuart digital SMP3 machine. IR spectroscopy was undertaken using a Jasco/MIRacle FT/IR-4100typeA spectrometer on the solid compounds, or KBr IR spectra were obtained on a spectrometer. The relative intensities of the peaks are denoted by (s) = strong, (m) = medium and (w) = weak, whilst (br) is used to describe broad peaks. MS spectra were measured using a Bruker Daltronics micrOTOF machine with electrospray ionisation (ESI) or on a Thermo LCQ using electrospray ionisation, with  $<5$  ppm error recorded for all HRMS samples. UV-visible spectra were recorded using a JASCO V-560 using quartz cells (1 cm path length). Solid-state UV-visible spectra were recorded using JASCO ISV-469 instrument. Elemental analysis was carried out on an Exeter Analytical CE-440 Elemental Analyser. Room temperature was between  $13$ - $25$   $^\circ\text{C}$ .

Compounds **1** and **2** were prepared according to the literature.<sup>1,2</sup>

## 2. Synthetic chemistry: experimental details for compounds **3** and **4**

### (1E,4E)-1-(2-(diphenylphosphorothioyl)phenyl)-5-phenylpentan-1,4-dien-3-one, **3**

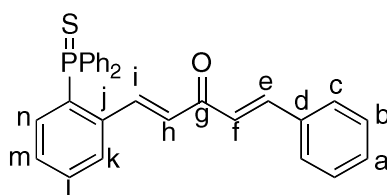

2-(Diphenylthiophosphino)benzaldehyde, **1** (0.75 g, 1 eq., 2.3 mmol) and cinammoyl methylenetriphenylphosphorane, **2** (1.42 g, 1.5 eq., 3.4 mmol) were dissolved in toluene (35 mL) and heated to  $80$   $^\circ\text{C}$  for 48 h. The toluene was removed *in vacuo*. Purification by column chromatography on silica gel eluting with EtOAc:toluene (3:97 v/v) gave the product as a yellow solid (0.84 g, 81 %). M.p.  $199$ - $200$   $^\circ\text{C}$ .  $^1\text{H}$  NMR (400 MHz,  $\text{CD}_2\text{Cl}_2$ )  $\delta$  8.41 (dd,  $^3J_{\text{HH}} = 16.0$  Hz,  $^1J_{\text{HP}} = 1.0$  Hz, 1H,  $\text{H}_i$ ), 7.89-7.77 (m, 5H,  $\text{H}_k$  and *o*-Ph), 7.64-7.39 (m, 13H, Ar), 7.33 (apparent tdd,  $J = 7.5, 2.5, 1.0$  Hz, 1H,  $\text{H}_m$ ), 7.06 (dddd,  $J = 14.5, 8.0, 1.5, 0.5$

Hz, 1H, H<sub>n</sub>), 6.90 (d, <sup>3</sup>J<sub>HH</sub> = 16.0 Hz, 1H, H<sub>f</sub>), 6.61 (d, <sup>3</sup>J<sub>HH</sub> = 16.0 Hz, 1H, H<sub>h</sub>); <sup>13</sup>C NMR (100 MHz, CD<sub>2</sub>Cl<sub>2</sub>) δ 189.4 (C<sub>g</sub>), 143.0 (C<sub>e</sub>), 141.9 (d, <sup>3</sup>J<sub>CP</sub> = 8 Hz, C<sub>i</sub>), 138.8 (d, <sup>2</sup>J<sub>CP</sub> = 8 Hz, C<sub>j</sub>), 135.3(C<sub>d</sub>), 134.0 (d, <sup>1</sup>J<sub>CP</sub> = 83 Hz, *ipso*-C), 133.4 (d, <sup>2</sup>J<sub>CP</sub> = 11 Hz, H<sub>n</sub>), 132.7 (d, <sup>2</sup>J<sub>CP</sub> = 11 Hz, *o*-Ph), 132.4 (d, <sup>4</sup>J<sub>CP</sub> = 3 Hz, H<sub>i</sub>), 132.3 (d, <sup>1</sup>J<sub>CP</sub> = 85 Hz, *ipso*-C), 132.2 (d, <sup>4</sup>J<sub>CP</sub> = 3 Hz, *p*-Ph), 130.7 (C<sub>a</sub>), 129.7 (d, <sup>3</sup>J<sub>CP</sub> = 12 Hz, H<sub>m</sub>), 129.2 (Ar), 129.2 (C<sub>h</sub>), 129.0 (d, <sup>3</sup>J<sub>CP</sub> = 13 Hz, *m*-Ph), 128.8 (d, <sup>3</sup>J<sub>CP</sub> = 9 Hz, H<sub>k</sub>), 128.7 (Ar), 123.4 (C<sub>f</sub>); <sup>31</sup>P NMR (162 MHz, CD<sub>2</sub>Cl<sub>2</sub>) δ 42.14 (s); HRMS (ESI) m/z 451.1285 [MH]<sup>+</sup> (calculated for C<sub>29</sub>H<sub>24</sub>OPS: 451.1280); LRMS (ESI) m/z (rel.%) 473 [MNa]<sup>+</sup> (20), 451 [MH]<sup>+</sup> (100), 346 (7); IR (ATR, ν cm<sup>-1</sup>): 3057 (w), 1653 (m), 1593 (m), 1436 (m), 1331 (br, m), 1182 (br, m), 1096 (s), 984 (m), 764 (s), 749 (m), 708 (s), 689 (s), 636 (s). UV-vis (DCM) λ<sub>max</sub> nm: 306 (ε = 4218 mol<sup>-1</sup>dm<sup>3</sup>cm<sup>-1</sup>); UV-Vis (solid) λ<sub>max</sub> nm: 289, (br shoulder to 450); Anal. Calcd. for C<sub>29</sub>H<sub>23</sub>OPS (450) C 77.31, H 5.15; Observed C 77.10, H 5.14.

Crystals suitable for X-ray crystallography were grown from a solution of **3** in CH<sub>2</sub>Cl<sub>2</sub> layered with Et<sub>2</sub>O.

#### [2+2] Intermolecular cycloaddition product, **4**

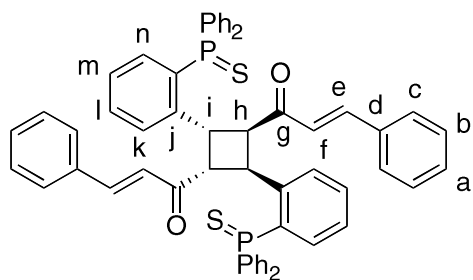

Compound **3** was left as a solid in a clear colourless glass flask for two months under ambient conditions (*i.e.* exposed to stray external sunlight and fluorescent light). The product was obtained as a white solid (>99% conversion to a single product determined by <sup>1</sup>H NMR spectroscopy). M.p. >225 °C<sub>(dec.)</sub>. <sup>1</sup>H NMR (400 MHz, CDCl<sub>3</sub>) δ 7.88-7.78 (m, 4H, Ar), 7.76-7.67 (m, 4H, Ar), 7.54-7.44 (m, 12H, Ar), 7.43-7.38 (m, 4H, Ar), 7.37-7.23 (m, 10H, H<sub>i</sub> and Ar), 7.10 (d, <sup>3</sup>J<sub>HH</sub> = 16.0 Hz, 2H, H<sub>e</sub>), 6.96-6.89 (m, 2H, H<sub>m</sub>), 6.86 (d, <sup>3</sup>J<sub>HH</sub> = 16.0 Hz, 2H, H<sub>f</sub>), 6.68 (ddd, J<sub>HP</sub> = 15.0 Hz, J<sub>HH</sub> = 8.0, 1.0 Hz, 2H, H<sub>n</sub>), 5.44 (dd, J = 10.5, 7.5 Hz, 2H, H<sub>i</sub>), 4.34 (dd, <sup>3</sup>J<sub>HH</sub> = 10.5, 7.5 Hz, 2H, H<sub>h</sub>); <sup>13</sup>C NMR (100 MHz, CDCl<sub>3</sub>) δ 196.9 (C<sub>g</sub>), 142.9 (d, J<sub>CP</sub> = 9 Hz, C<sub>j</sub>), 142.1 (C<sub>e</sub>), 135.3 (C<sub>d</sub>), 133.5 (d, <sup>1</sup>J<sub>CP</sub> = 85 Hz, *ipso*-C), 133.1 (d, J<sub>CP</sub> = 12 Hz, Ar), 132.8 (d, J<sub>CP</sub> = 10 Hz, Ar), 132.2 (d, <sup>1</sup>J<sub>CP</sub> = 84 Hz, *ipso*-C), 132.2 (d, J<sub>CP</sub> = 11 Hz, Ar), 132.0 (d, J<sub>CP</sub> = 3 Hz, Ar), 132.0 (d, J<sub>CP</sub> = 3 Hz, Ar), 131.9 (d, <sup>1</sup>J<sub>CP</sub> = 85 Hz, *ipso*-C), 131.5 (d, J<sub>CP</sub> = 3 Hz, Ar), 129.9 (Ar), 129.7 (d, J<sub>CP</sub> = 10 Hz, Ar), 128.8 (d, J<sub>CP</sub> = 13 Hz, Ar), 128.70 (Ar), 128.69 (Ar), 128.6 (d, J<sub>CP</sub> = 12 Hz, Ar), 126.4 (d, J<sub>CP</sub> = 13 Hz, C<sub>m</sub>), 125.7 (C<sub>f</sub>), 54.0 (C<sub>i</sub>), 39.9 (d, J<sub>CP</sub> = 7 Hz, C<sub>h</sub>); <sup>31</sup>P NMR (162 MHz, CDCl<sub>3</sub>) δ 43.19 (s); HRMS (ESI) m/z 901.2449 [MH]<sup>+</sup> (calculated for C<sub>58</sub>H<sub>47</sub>O<sub>2</sub>P<sub>2</sub>S<sub>2</sub>: 901.2487); IR (KBr, ν cm<sup>-1</sup>): 3055(m), 2919 (w), 1682 (m), 1650 (w), 1609 (s), 1575 (m), 1480 (w), 1448 (w), 1437 (s), 1329 (m), 1128 (w), 1099 (s), 1079 (m), 1067 (m), 770 (w), 748 (m), 712 (s), 691 (s), 636 (s), 614 (m), 532 (w), 516 (m); UV-vis (CH<sub>2</sub>Cl<sub>2</sub>) λ<sub>max</sub> nm: 300 (ε = 56471 mol<sup>-1</sup>dm<sup>3</sup>cm<sup>-1</sup>).

Colourless crystals suitable for X-ray diffraction were obtained from acetone and CD<sub>2</sub>Cl<sub>2</sub>.

### 3. Photochemistry experiments

#### 3.1 Single crystal XRD experiments

##### 3.1.1 Details of single crystal X-ray diffraction experiments carried out at the University of York

Single X-ray diffraction data were collected at 110 K in the dark on an Oxford diffractometer or on a Bruker Smart Apex diffractometer with Mo-K $\alpha$  radiation ( $\lambda = 0.71073 \text{ \AA}$ ) using a SMART CCD camera unless otherwise stated. Diffractometer control, data collection and initial unit cell determination was performed using "SMART".<sup>3</sup> Frame integration and unit-cell refinement software was carried out with "SAINT+".<sup>4</sup> Absorption corrections were applied by SADABS (v2.10, Sheldrick). Structures were solved by direct methods using SHELXS-97<sup>5</sup> and refined by full-matrix least squares using SHELXL-97. All non-hydrogen atoms were refined anisotropically. Hydrogen atoms were located geometrically and refined using a "riding model". Due to the disorder in the irradiated crystals restraints and constraints were applied, depending on the refinement requirements. The following possibilities were used: AFIX 66, ISOR, EADP, SADI.

The full diffraction dataset for a single crystal of **3** was obtained (ijf0909m). The crystal was then exposed to light from an incandescent bulb whilst at 110 K for 2 h. The full diffraction dataset was then collected again. The solution showed that no change had occurred. The crystal was then exposed to light from a fluorescent strip light for 48 h at room temperature. The diffraction data was then collected at 110 K and showed that 31% of the crystal had converted to the [2+2] photo-dimer **4** (ijf0911m). To see if the conversion could be increased the crystal was left in sunlight for 1 week. Unfortunately, the crystal was no longer of sufficient quality to diffract.

**Table 1** Single crystal structures.

| Compound reference                                                            | ijf0909m ( <b>3</b> )               | ijf0911m ( <b>3</b> and <b>4</b> )  | ijf0902 ( <b>3</b> and <b>4</b> )                                                                                                 | ijsf1114 ( <b>4</b> )                                                        |
|-------------------------------------------------------------------------------|-------------------------------------|-------------------------------------|-----------------------------------------------------------------------------------------------------------------------------------|------------------------------------------------------------------------------|
| Chemical formula                                                              | C <sub>29</sub> H <sub>23</sub> OPS | C <sub>29</sub> H <sub>23</sub> OPS | 0.81(C <sub>58</sub> H <sub>46</sub> O <sub>2</sub> P <sub>2</sub> S <sub>2</sub> )•<br>0.38(C <sub>29</sub> H <sub>23</sub> OPS) | C <sub>58</sub> H <sub>46</sub> O <sub>2</sub> P <sub>2</sub> S <sub>2</sub> |
| Formula Mass                                                                  | 450.50                              | 450.50                              | 901.03                                                                                                                            | 901.01                                                                       |
| Crystal system                                                                | Monoclinic                          | Monoclinic                          | Monoclinic                                                                                                                        | Monoclinic                                                                   |
| <i>a</i> /Å                                                                   | 9.4829(7)                           | 9.3900(7)                           | 9.39010(10)                                                                                                                       | 11.9199(2)                                                                   |
| <i>b</i> /Å                                                                   | 17.0177(13)                         | 17.1409(14)                         | 17.15340(10)                                                                                                                      | 14.3119(4)                                                                   |
| <i>c</i> /Å                                                                   | 14.5741(11)                         | 14.6595(12)                         | 14.8607(2)                                                                                                                        | 13.7279(4)                                                                   |
| <i>α</i> /°                                                                   | 90                                  | 90                                  | 9                                                                                                                                 | 90                                                                           |
| <i>β</i> /°                                                                   | 101.8810(10)                        | 102.038(2)                          | 102.3283(10)                                                                                                                      | 102.026(2)                                                                   |
| <i>γ</i> /°                                                                   | 90                                  | 90                                  | 90                                                                                                                                | 90                                                                           |
| Unit cell volume/Å <sup>3</sup>                                               | 2301.5(3)                           | 2307.6(3)                           | 2338.45(4)                                                                                                                        | 2290.54(10)                                                                  |
| Temperature/K                                                                 | 110(2)                              | 110(2)                              | 120(2)                                                                                                                            | 110(10)                                                                      |
| Space group                                                                   | <i>P</i> 2 <sub>1</sub> / <i>n</i>  | <i>P</i> 2 <sub>1</sub> / <i>n</i>  | <i>P</i> 2 <sub>1</sub> / <i>n</i>                                                                                                | <i>P</i> 2 <sub>1</sub> / <i>n</i>                                           |
| No. of formula units per unit cell, <i>Z</i>                                  | 4                                   | 4                                   | 2                                                                                                                                 | 2                                                                            |
| No. of reflections measured                                                   | 23431                               | 23321                               | 21056                                                                                                                             | 12391                                                                        |
| No. of independent reflections                                                | 5718                                | 5737                                | 4254                                                                                                                              | 6896                                                                         |
| <i>R</i> <sub>int</sub>                                                       | 0.0248                              | 0.0259                              | 0.0287                                                                                                                            | 0.0284                                                                       |
| Final <i>R</i> <sub><i>I</i></sub> values ( <i>I</i> > 2σ( <i>I</i> ))        | 0.0360                              | 0.0421                              | 0.0395                                                                                                                            | 0.0462                                                                       |
| Final <i>wR</i> ( <i>F</i> <sup>2</sup> ) values ( <i>I</i> > 2σ( <i>I</i> )) | 0.0940                              | 0.1043                              | 0.0981                                                                                                                            | 0.0991                                                                       |
| Final <i>R</i> <sub><i>I</i></sub> values (all data)                          | 0.0425                              | 0.0548                              | 0.0468                                                                                                                            | 0.0629                                                                       |
| Final <i>wR</i> ( <i>F</i> <sup>2</sup> ) values (all data)                   | 0.0991                              | 0.1126                              | 0.1022                                                                                                                            | 0.1077                                                                       |

ijf0911: Mixture of **3** and [2+2] photo-dimer, **4** with a refined ratio of 0.689:0.311(3). ADP of pairs of disordered atom constrained to be equal as follows: C1 C1A, C2 C2A, C3 C3A, C4 C4A, C5 C5A, C6 C6A, C12A C12, C13A C13, C14 C14A, C15A C15, C16A C16, C17A C17. Same distance restraint on C7-C6 & C7A-C6A; C7-C8 & C7A-C8A. Rigid bond restraint on C9-C8; C8A-C9A-C10A. Isotropic ADP restraint on C8A C7A C9 C9A C10A O1 O1A.

### 3.1.2 Details of single crystal X-ray diffraction experiments carried out at the University of Bath

The data were collected on an Oxford Diffraction Gemini A Ultra CCD Diffractometer with Mo-Kα radiation ( $\lambda = 0.71073 \text{ \AA}$ ) fitted with an Oxford Cryojet crystal cooling apparatus.

In the first series of experiments investigating the conversion of **3** to **4** as a function of time, a suitable single crystal of **3** was placed on the diffractometer and flash cooled to 180 K in the absence of any external light, and a high quality ground state X-ray structure was collected. The crystal was then irradiated with six 400 nm LEDs (350 mcd, 3.7 V, 20 mA) using a specially designed LED ring positioning the LEDs 1 cm from the crystal in a uniform circle.<sup>6</sup> In addition the crystal was continuously rotated to ensure the maximum possible uniformity of irradiation. After a period of 2 h a second identical data collection was conducted in the absence of external light, from which the first photoexcited structure was determined. This process was repeated and the crystal irradiated for periods of 2 h between subsequent data collections, until a maximum level of conversion to the photoproduct **4** had been achieved (18 h irradiation).

**Table 2** Photoconversion of **3** to **4** as a function of time

| Compound reference                                                            | 0h                                  | 2h                                                                                                                                | 4h                                                                                                                                | 6h                                                                                                                                |
|-------------------------------------------------------------------------------|-------------------------------------|-----------------------------------------------------------------------------------------------------------------------------------|-----------------------------------------------------------------------------------------------------------------------------------|-----------------------------------------------------------------------------------------------------------------------------------|
| Chemical formula                                                              | C <sub>29</sub> H <sub>23</sub> OPS | 0.51(C <sub>58</sub> H <sub>46</sub> O <sub>2</sub> P <sub>2</sub> S <sub>2</sub> )<br>•0.49(C <sub>29</sub> H <sub>23</sub> OPS) | 0.59(C <sub>58</sub> H <sub>46</sub> O <sub>2</sub> P <sub>2</sub> S <sub>2</sub> )<br>•0.41(C <sub>29</sub> H <sub>23</sub> OPS) | 0.51(C <sub>58</sub> H <sub>46</sub> O <sub>2</sub> P <sub>2</sub> S <sub>2</sub> )<br>•0.37(C <sub>29</sub> H <sub>23</sub> OPS) |
| Formula Mass                                                                  | 450.5                               | 450.5                                                                                                                             | 450.5                                                                                                                             | 450.5                                                                                                                             |
| Crystal system                                                                | Monoclinic                          | Monoclinic                                                                                                                        | Monoclinic                                                                                                                        | Monoclinic                                                                                                                        |
| <i>a</i> /Å                                                                   | 9.5167(3)                           | 9.3791(11)                                                                                                                        | 9.3700(9)                                                                                                                         | 9.3726(7)                                                                                                                         |
| <i>b</i> /Å                                                                   | 17.0830(4)                          | 17.2497(17)                                                                                                                       | 17.2807(14)                                                                                                                       | 17.2873(11)                                                                                                                       |
| <i>c</i> /Å                                                                   | 14.5809(6)                          | 14.7021(15)                                                                                                                       | 14.7363(14)                                                                                                                       | 14.7499(12)                                                                                                                       |
| <i>α</i> /°                                                                   | 90                                  | 90                                                                                                                                | 90                                                                                                                                | 90                                                                                                                                |
| <i>β</i> /°                                                                   | 101.961(3)                          | 102.069(9)                                                                                                                        | 102.134(8)                                                                                                                        | 102.167(7)                                                                                                                        |
| <i>γ</i> /°                                                                   | 90                                  | 90                                                                                                                                | 90                                                                                                                                | 90                                                                                                                                |
| Unit cell volume/Å <sup>3</sup>                                               | 2319.0(2)                           | 2326.0(4)                                                                                                                         | 2332.8(4)                                                                                                                         | 2336.2(3)                                                                                                                         |
| Temperature/K                                                                 | 180(2)                              | 180(2)                                                                                                                            | 180(2)                                                                                                                            | 180(2)                                                                                                                            |
| Space group                                                                   | <i>P</i> 2(1)/ <i>n</i>             | <i>P</i> 2(1)/ <i>n</i>                                                                                                           | <i>P</i> 2(1)/ <i>n</i>                                                                                                           | <i>P</i> 2(1)/ <i>n</i>                                                                                                           |
| No. of formula units per unit cell, <i>Z</i>                                  | 4                                   | 4                                                                                                                                 | 4                                                                                                                                 | 4                                                                                                                                 |
| No. of reflections measured                                                   | 14600                               | 17523                                                                                                                             | 17895                                                                                                                             | 18304                                                                                                                             |
| No. of independent reflections                                                | 7634                                | 6786                                                                                                                              | 7057                                                                                                                              | 7058                                                                                                                              |
| <i>R</i> <sub>int</sub>                                                       | 0.0425                              | 0.0661                                                                                                                            | 0.0521                                                                                                                            | 0.0506                                                                                                                            |
| Final <i>R</i> <sub><i>I</i></sub> values ( <i>I</i> > 2σ( <i>I</i> ))        | 0.0454                              | 0.0534                                                                                                                            | 0.0469                                                                                                                            | 0.0472                                                                                                                            |
| Final <i>wR</i> ( <i>F</i> <sup>2</sup> ) values ( <i>I</i> > 2σ( <i>I</i> )) | 0.0831                              | 0.1124                                                                                                                            | 0.0949                                                                                                                            | 0.0948                                                                                                                            |
| Final <i>R</i> <sub><i>I</i></sub> values (all data)                          | 0.1106                              | 0.1263                                                                                                                            | 0.1230                                                                                                                            | 0.1268                                                                                                                            |
| Final <i>wR</i> ( <i>F</i> <sup>2</sup> ) values (all data)                   | 0.0946                              | 0.1262                                                                                                                            | 0.1065                                                                                                                            | 0.1073                                                                                                                            |

| Compound reference                                                            | 8h                                                                                                                                | 10h                                                                                                                               | 12h                                                                                                                               | 14h                                                                                                                               |
|-------------------------------------------------------------------------------|-----------------------------------------------------------------------------------------------------------------------------------|-----------------------------------------------------------------------------------------------------------------------------------|-----------------------------------------------------------------------------------------------------------------------------------|-----------------------------------------------------------------------------------------------------------------------------------|
| Chemical formula                                                              | 0.65(C <sub>58</sub> H <sub>46</sub> O <sub>2</sub> P <sub>2</sub> S <sub>2</sub> )<br>•0.35(C <sub>29</sub> H <sub>23</sub> OPS) | 0.66(C <sub>58</sub> H <sub>46</sub> O <sub>2</sub> P <sub>2</sub> S <sub>2</sub> )<br>•0.34(C <sub>29</sub> H <sub>23</sub> OPS) | 0.67(C <sub>58</sub> H <sub>46</sub> O <sub>2</sub> P <sub>2</sub> S <sub>2</sub> )<br>•0.33(C <sub>29</sub> H <sub>23</sub> OPS) | 0.68(C <sub>58</sub> H <sub>46</sub> O <sub>2</sub> P <sub>2</sub> S <sub>2</sub> )<br>•0.32(C <sub>29</sub> H <sub>23</sub> OPS) |
| Formula Mass                                                                  | 450.5                                                                                                                             | 450.5                                                                                                                             | 450.5                                                                                                                             | 450.5                                                                                                                             |
| Crystal system                                                                | Monoclinic                                                                                                                        | Monoclinic                                                                                                                        | Monoclinic                                                                                                                        | Monoclinic                                                                                                                        |
| <i>a</i> /Å                                                                   | 9.3734(9)                                                                                                                         | 9.3741(9)                                                                                                                         | 9.3749(9)                                                                                                                         | 9.3761(9)                                                                                                                         |
| <i>b</i> /Å                                                                   | 17.2887(13)                                                                                                                       | 17.2885(14)                                                                                                                       | 17.2881(14)                                                                                                                       | 17.2872(14)                                                                                                                       |
| <i>c</i> /Å                                                                   | 14.7596(13)                                                                                                                       | 14.7653(13)                                                                                                                       | 14.7691(14)                                                                                                                       | 14.7712(14)                                                                                                                       |
| <i>α</i> /°                                                                   | 90                                                                                                                                | 90                                                                                                                                | 90                                                                                                                                | 90                                                                                                                                |
| <i>β</i> /°                                                                   | 102.190(8)                                                                                                                        | 102.202(8)                                                                                                                        | 102.220(8)                                                                                                                        | 102.226(8)                                                                                                                        |
| <i>γ</i> /°                                                                   | 90                                                                                                                                | 90                                                                                                                                | 90                                                                                                                                | 90                                                                                                                                |
| Unit cell volume/Å <sup>3</sup>                                               | 2337.9(4)                                                                                                                         | 2338.9(4)                                                                                                                         | 2339.5(4)                                                                                                                         | 2339.9(4)                                                                                                                         |
| Temperature/K                                                                 | 180(2)                                                                                                                            | 180(2)                                                                                                                            | 180(2)                                                                                                                            | 180(2)                                                                                                                            |
| Space group                                                                   | <i>P</i> 2(1)/ <i>n</i>                                                                                                           | <i>P</i> 2(1)/ <i>n</i>                                                                                                           | <i>P</i> 2(1)/ <i>n</i>                                                                                                           | <i>P</i> 2(1)/ <i>n</i>                                                                                                           |
| No. of formula units per unit cell, <i>Z</i>                                  | 4                                                                                                                                 | 4                                                                                                                                 | 4                                                                                                                                 | 4                                                                                                                                 |
| No. of reflections measured                                                   | 18322                                                                                                                             | 18246                                                                                                                             | 18324                                                                                                                             | 55684                                                                                                                             |
| No. of independent reflections                                                | 7062                                                                                                                              | 7060                                                                                                                              | 7058                                                                                                                              | 7075                                                                                                                              |
| <i>R</i> <sub>int</sub>                                                       | 0.0493                                                                                                                            | 0.0508                                                                                                                            | 0.0503                                                                                                                            | 0.0597                                                                                                                            |
| Final <i>R</i> <sub><i>I</i></sub> values ( <i>I</i> > 2σ( <i>I</i> ))        | 0.0480                                                                                                                            | 0.0490                                                                                                                            | 0.0487                                                                                                                            | 0.0518                                                                                                                            |
| Final <i>wR</i> ( <i>F</i> <sup>2</sup> ) values ( <i>I</i> > 2σ( <i>I</i> )) | 0.0994                                                                                                                            | 0.0992                                                                                                                            | 0.0954                                                                                                                            | 0.1319                                                                                                                            |
| Final <i>R</i> <sub><i>I</i></sub> values (all data)                          | 0.1276                                                                                                                            | 0.1293                                                                                                                            | 0.1308                                                                                                                            | 0.1064                                                                                                                            |
| Final <i>wR</i> ( <i>F</i> <sup>2</sup> ) values (all data)                   | 0.1124                                                                                                                            | 0.1133                                                                                                                            | 0.1091                                                                                                                            | 0.1439                                                                                                                            |

---

|                                              |                                                                                                                                   |                                                                                                                                   |
|----------------------------------------------|-----------------------------------------------------------------------------------------------------------------------------------|-----------------------------------------------------------------------------------------------------------------------------------|
| Compound reference                           | 16h                                                                                                                               | 18h                                                                                                                               |
| Chemical formula                             | 0.68(C <sub>58</sub> H <sub>46</sub> O <sub>2</sub> P <sub>2</sub> S <sub>2</sub> )<br>•0.32(C <sub>29</sub> H <sub>23</sub> OPS) | 0.69(C <sub>58</sub> H <sub>46</sub> O <sub>2</sub> P <sub>2</sub> S <sub>2</sub> )<br>•0.31(C <sub>29</sub> H <sub>23</sub> OPS) |
| Formula Mass                                 | 450.5                                                                                                                             | 450.5                                                                                                                             |
| Crystal system                               | Monoclinic                                                                                                                        | Monoclinic                                                                                                                        |
| a/Å                                          | 9.3774(9)                                                                                                                         | 9.3781(9)                                                                                                                         |
| b/Å                                          | 17.2882(14)                                                                                                                       | 17.2875(14)                                                                                                                       |
| c/Å                                          | 14.7754(14)                                                                                                                       | 14.7775(14)                                                                                                                       |
| α/°                                          | 90                                                                                                                                | 90                                                                                                                                |
| β/°                                          | 102.233(8)                                                                                                                        | 102.232(8)                                                                                                                        |
| γ/°                                          | 90                                                                                                                                | 90                                                                                                                                |
| Unit cell volume/Å <sup>3</sup>              | 2341.0(4)                                                                                                                         | 2341.4(4)                                                                                                                         |
| Temperature/K                                | 180(2)                                                                                                                            | 180(2)                                                                                                                            |
| Space group                                  | P2(1)/n                                                                                                                           | P2(1)/n                                                                                                                           |
| No. of formula units per unit cell, Z        | 4                                                                                                                                 | 4                                                                                                                                 |
| No. of reflections measured                  | 37632                                                                                                                             | 19733                                                                                                                             |
| No. of independent reflections               | 7067                                                                                                                              | 7072                                                                                                                              |
| R <sub>int</sub>                             | 0.0578                                                                                                                            | 0.0515                                                                                                                            |
| Final R <sub>1</sub> values (I > 2σ(I))      | 0.0504                                                                                                                            | 0.0496                                                                                                                            |
| Final wR(F <sub>2</sub> ) values (I > 2σ(I)) | 0.1202                                                                                                                            | 0.0996                                                                                                                            |
| Final R <sub>1</sub> values (all data)       | 0.1136                                                                                                                            | 0.1301                                                                                                                            |
| Final wR(F <sub>2</sub> ) values (all data)  | 0.1333                                                                                                                            | 0.1131                                                                                                                            |

In the second series of experiments investigating the change in photoconversion with variable temperature, a suitable single crystal was first mounted on the diffractometer and flash cooled to 100 K before a ground state data collection was conducted in the absence of external light. The crystal was then subjected to *c.a.* 16 h irradiation from six 400 nm LEDs using the same experimental set-up, before a subsequent X-ray data set was collected to determine the level of conversion the photoproduct **4**. This process was repeated at regular temperature intervals between 100 K and 220 K, with fresh crystals used where (irreversible) photoconversion had been achieved to ensure that at each temperature a pure sample of **3** was present at the start of the experiment. At temperatures above 220 K, UV light exposure caused the crystal to deteriorate to such a degree that a reliable solution could not be modeled from the resultant X-ray data.

**Table 3** Photoconversion of **3** to **4** as a function of temperature

| Compound reference                                                            | 140K                                  | 150K                                                                                                                              | 160K                                                                                                                              | 170K                                                                                                                              |
|-------------------------------------------------------------------------------|---------------------------------------|-----------------------------------------------------------------------------------------------------------------------------------|-----------------------------------------------------------------------------------------------------------------------------------|-----------------------------------------------------------------------------------------------------------------------------------|
| Chemical formula                                                              | (C <sub>29</sub> H <sub>23</sub> OPS) | 0.11(C <sub>58</sub> H <sub>46</sub> O <sub>2</sub> P <sub>2</sub> S <sub>2</sub> )<br>•0.89(C <sub>29</sub> H <sub>23</sub> OPS) | 0.17(C <sub>58</sub> H <sub>46</sub> O <sub>2</sub> P <sub>2</sub> S <sub>2</sub> )<br>•0.83(C <sub>29</sub> H <sub>23</sub> OPS) | 0.35(C <sub>58</sub> H <sub>46</sub> O <sub>2</sub> P <sub>2</sub> S <sub>2</sub> )<br>•0.65(C <sub>29</sub> H <sub>23</sub> OPS) |
| Formula Mass                                                                  | 450.5                                 | 450.5                                                                                                                             | 450.5                                                                                                                             | 450.5                                                                                                                             |
| Crystal system                                                                | Monoclinic                            | Monoclinic                                                                                                                        | Monoclinic                                                                                                                        | Monoclinic                                                                                                                        |
| <i>a</i> /Å                                                                   | 9.4946(2)                             | 9.4645(2)                                                                                                                         | 9.4512(2)                                                                                                                         | 9.407(5)                                                                                                                          |
| <i>b</i> /Å                                                                   | 17.0479(4)                            | 17.0968(4)                                                                                                                        | 17.1319(4)                                                                                                                        | 17.207(5)                                                                                                                         |
| <i>c</i> /Å                                                                   | 14.5784(4)                            | 14.5914(4)                                                                                                                        | 14.6123(5)                                                                                                                        | 14.659(5)                                                                                                                         |
| $\alpha$ /°                                                                   | 90                                    | 90                                                                                                                                | 90                                                                                                                                | 90                                                                                                                                |
| $\beta$ /°                                                                    | 101.951(2)                            | 102.008(3)                                                                                                                        | 102.013(3)                                                                                                                        | 102.087(5)                                                                                                                        |
| $\gamma$ /°                                                                   | 90                                    | 90                                                                                                                                | 90                                                                                                                                | 90                                                                                                                                |
| Unit cell volume/Å <sup>3</sup>                                               | 2308.56(10)                           | 2309.41(10)                                                                                                                       | 2314.17(11)                                                                                                                       | 2320.2(16)                                                                                                                        |
| Temperature/K                                                                 | 140(2)                                | 150(2)                                                                                                                            | 160(2)                                                                                                                            | 170(2)                                                                                                                            |
| Space group                                                                   | <i>P2(1)/n</i>                        | <i>P2(1)/n</i>                                                                                                                    | <i>P2(1)/n</i>                                                                                                                    | <i>P2(1)/n</i>                                                                                                                    |
| No. of formula units per unit cell, <i>Z</i>                                  | 4                                     | 4                                                                                                                                 | 4                                                                                                                                 | 4                                                                                                                                 |
| No. of reflections measured                                                   | 11979                                 | 11446                                                                                                                             | 11495                                                                                                                             | 11659                                                                                                                             |
| No. of independent reflections                                                | 5420                                  | 5404                                                                                                                              | 5404                                                                                                                              | 5423                                                                                                                              |
| <i>R</i> <sub>int</sub>                                                       | 0.0422                                | 0.0295                                                                                                                            | 0.0353                                                                                                                            | 0.0577                                                                                                                            |
| Final <i>R</i> <sub><i>I</i></sub> values ( <i>I</i> > 2σ( <i>I</i> ))        | 0.0508                                | 0.0464                                                                                                                            | 0.0506                                                                                                                            | 0.0669                                                                                                                            |
| Final <i>wR</i> ( <i>F</i> <sup>2</sup> ) values ( <i>I</i> > 2σ( <i>I</i> )) | 0.0990                                | 0.0895                                                                                                                            | 0.0929                                                                                                                            | 0.1265                                                                                                                            |
| Final <i>R</i> <sub><i>I</i></sub> values (all data)                          | 0.0856                                | 0.0740                                                                                                                            | 0.0865                                                                                                                            | 0.1331                                                                                                                            |
| Final <i>wR</i> ( <i>F</i> <sup>2</sup> ) values (all data)                   | 0.1122                                | 0.1012                                                                                                                            | 0.1076                                                                                                                            | 0.1559                                                                                                                            |

| Compound reference                                                            | 173K                                                                                                                              | 180K                                                                                                                              | 220K                                                                                                                              |
|-------------------------------------------------------------------------------|-----------------------------------------------------------------------------------------------------------------------------------|-----------------------------------------------------------------------------------------------------------------------------------|-----------------------------------------------------------------------------------------------------------------------------------|
| Chemical formula                                                              | 0.46(C <sub>58</sub> H <sub>46</sub> O <sub>2</sub> P <sub>2</sub> S <sub>2</sub> )<br>•0.54(C <sub>29</sub> H <sub>23</sub> OPS) | 0.69(C <sub>58</sub> H <sub>46</sub> O <sub>2</sub> P <sub>2</sub> S <sub>2</sub> )<br>•0.31(C <sub>29</sub> H <sub>23</sub> OPS) | 0.70(C <sub>58</sub> H <sub>46</sub> O <sub>2</sub> P <sub>2</sub> S <sub>2</sub> )<br>•0.30(C <sub>29</sub> H <sub>23</sub> OPS) |
| Formula Mass                                                                  | 450.5                                                                                                                             | 450.5                                                                                                                             | 450.5                                                                                                                             |
| Crystal system                                                                | Monoclinic                                                                                                                        | Monoclinic                                                                                                                        | Monoclinic                                                                                                                        |
| <i>a</i> /Å                                                                   | 9.3704(14)                                                                                                                        | 9.3801(2)                                                                                                                         | 9.406(5)                                                                                                                          |
| <i>b</i> /Å                                                                   | 17.241(3)                                                                                                                         | 17.2580(2)                                                                                                                        | 17.312(5)                                                                                                                         |
| <i>c</i> /Å                                                                   | 14.693(2)                                                                                                                         | 14.7370(3)                                                                                                                        | 14.818(5)                                                                                                                         |
| $\alpha$ /°                                                                   | 90                                                                                                                                | 90                                                                                                                                | 90                                                                                                                                |
| $\beta$ /°                                                                    | 102.056(2)                                                                                                                        | 102.273(2)                                                                                                                        | 102.305(5)                                                                                                                        |
| $\gamma$ /°                                                                   | 90                                                                                                                                | 90                                                                                                                                | 90                                                                                                                                |
| Unit cell volume/Å <sup>3</sup>                                               | 2321.4(6)                                                                                                                         | 2331.13(7)                                                                                                                        | 2357.5(16)                                                                                                                        |
| Temperature/K                                                                 | 173(2)                                                                                                                            | 180(2)                                                                                                                            | 220(2)                                                                                                                            |
| Space group                                                                   | <i>P2(1)/n</i>                                                                                                                    | <i>P2(1)/n</i>                                                                                                                    | <i>P2(1)/n</i>                                                                                                                    |
| No. of formula units per unit cell, <i>Z</i>                                  | 4                                                                                                                                 | 4                                                                                                                                 | 4                                                                                                                                 |
| No. of reflections measured                                                   | 30313                                                                                                                             | 19733                                                                                                                             | 18393                                                                                                                             |
| No. of independent reflections                                                | 8032                                                                                                                              | 7072                                                                                                                              | 5786                                                                                                                              |
| <i>R</i> <sub>int</sub>                                                       | 0.0683                                                                                                                            | 0.0515                                                                                                                            | 0.0466                                                                                                                            |
| Final <i>R</i> <sub><i>I</i></sub> values ( <i>I</i> > 2σ( <i>I</i> ))        | 0.0646                                                                                                                            | 0.0496                                                                                                                            | 0.0558                                                                                                                            |
| Final <i>wR</i> ( <i>F</i> <sup>2</sup> ) values ( <i>I</i> > 2σ( <i>I</i> )) | 0.1536                                                                                                                            | 0.1030                                                                                                                            | 0.1123                                                                                                                            |
| Final <i>R</i> <sub><i>I</i></sub> values (all data)                          | 0.0948                                                                                                                            | 0.1299                                                                                                                            | 0.1213                                                                                                                            |
| Final <i>wR</i> ( <i>F</i> <sup>2</sup> ) values (all data)                   | 0.1865                                                                                                                            | 0.1176                                                                                                                            | 0.1293                                                                                                                            |



### 3.2 Two-photon irradiation experiments

Non-resonant coherent two-photon absorption was achieved using the fundamental output of a single dye laser (Radiant Narrowscan, DCM/Rhodamine B) pumped by the second harmonic of a Nd:YAG laser (Continuum Surelite III) generating 5 ns pulses at 10 Hz, under the direction of Dr. Martin Cockett (University of York). The energy of the laser pre-amplifier was measured at 0.5 mJ per pulse (effectively 5 mW). With both preamplifier and amplifier on, the energy increased to between 10 and 13 mJ per pulse (*ca.* 100 to 130 mW).

Diffraction data were collected at 110 K on an Oxford Diffraction SuperNova diffractometer with Mo-K $\alpha$  radiation ( $\lambda = 0.71073$  Å) using a EOS CCD camera. The crystal was cooled with an Oxford Instruments Cryojet. Diffractometer control, data collection, initial unit cell determination, frame integration and unit-cell refinement was carried out with “CrysalisPro”.<sup>7</sup> Empirical absorption correction using spherical harmonics, implemented in SCALE3 ABSPACK scaling algorithm.<sup>8</sup> OLEX2<sup>9</sup> was used for overall structure solution, refinement and preparation of computer graphics and publication data. Within OLEX2, the algorithms used for structure solution were “direct methods”, using the “A short history of SHELX (Sheldrick, 2007)/Bruker”. Refinement by full-matrix least-squares used the SHELXL-97<sup>10</sup> algorithm within OLEX2.<sup>11</sup> All non-hydrogen atoms were refined anisotropically. Hydrogen atoms were placed using a “riding model” and included in the refinement at calculated positions. Due to the disorder in the irradiated crystals, restraints and constraints were applied, depending on the refinement requirements. The following were used in those cases: AFIX 66, ISOR, EADP, SADI.

#### Experiment 1:

The full diffraction dataset of a single crystal of **3** was collected at 110 K (ijf1027). The crystal was then exposed at room temperature to 605 nm radiation at 0.5 mJ per pulse for 10 min. The diffraction data was then obtained at 110 K (ijf1028). No change was observed. The energy was then increased to 13 mJ pulse and the crystal exposed to 605 nm for 25 min. The XRD data was then collected (ijf1029); the data was not of high quality as the crystal split. A rough estimation of the percentage converted to the [2+2] photo-dimer **4** was 66%. As the crystal had split, the pieces were divided and one of the pieces was exposed to further irradiation at the higher output energies (605 nm, 15 min one side and then rotated 180° and exposed for a further 15 min). The XRD data was obtained and solved showing that 71% conversion to [2+2] photo-dimer **4** was recorded (ijf1030).

#### Experiment 2:

The unit cell of a single crystal of **3**, was determined at 110 K ( $a = 9.492(2)$ ,  $b = 16.998(7)$ ,  $c = 14.578(4)$ ;  $\alpha = 90^\circ$ ,  $\beta = 101.84(2)^\circ$ ,  $\gamma = 90^\circ$ ). The crystal was then irradiated with 605 nm light at the higher output energies at ambient temperature for 20 min, whilst rotating on a mechanical stirrer (Citeno AQtS9, F.H.P. Motors) at

the lowest speed. The diffraction data were obtained at 110K and the crystal structure solved showing that 25% of the crystal had converted to the [2+2] photo-dimer **4** (ijf1038).

**Table 4** 2-Photon transformations

| Compound reference                                                            | ijf1027                             | ijf1028                             | ijf1029                             | ijf1030                             | ijf1038                             |
|-------------------------------------------------------------------------------|-------------------------------------|-------------------------------------|-------------------------------------|-------------------------------------|-------------------------------------|
| Chemical formula                                                              | C <sub>29</sub> H <sub>23</sub> OPS |
| Formula Mass                                                                  | 450.50                              | 450.50                              | 450.50                              | 450.50                              | 450.50                              |
| Crystal system                                                                |                                     |                                     |                                     |                                     |                                     |
| <i>a</i> /Å                                                                   | 9.4598(10)                          | 9.4904(3)                           | 9.3365(5)                           | 9.3733(3)                           | 9.3833(3)                           |
| <i>b</i> /Å                                                                   | 16.9974(14)                         | 17.0028(5)                          | 17.1396(6)                          | 17.2097(5)                          | 17.1058(4)                          |
| <i>c</i> /Å                                                                   | 14.5643(13)                         | 14.5622(4)                          | 14.7354(13)                         | 14.8077(5)                          | 14.6168(3)                          |
| <i>α</i> /°                                                                   | 90                                  | 90                                  | 90                                  | 90                                  | 90                                  |
| <i>β</i> /°                                                                   | 101.853(9)                          | 101.951(3)                          | 102.311(8)                          | 102.379(3)                          | 102.040(3)                          |
| <i>γ</i> /°                                                                   | 90                                  | 90                                  | 90                                  | 90                                  | 90                                  |
| Unit cell volume/Å <sup>3</sup>                                               | 2291.9(4)                           | 2298.89(11)                         | 2303.8(2)                           | 2333.12(13)                         | 2294.51(10)                         |
| Temperature/K                                                                 | 110.0                               | 110.0                               | 110.0                               | 110.0                               | 110.0                               |
| Space group                                                                   | <i>P</i> 2 <sub>1</sub> / <i>n</i>  |
| No. of formula units per unit cell, <i>Z</i>                                  | 4                                   | 4                                   | 4                                   | 4                                   | 4                                   |
| No. of reflections measured                                                   | 7539                                | 7096                                | 4050                                | 9725                                | 9051                                |
| No. of independent reflections                                                | 4017                                | 4020                                | 3037                                | 5517                                | 5202                                |
| <i>R</i> <sub>int</sub>                                                       | 0.0225                              | 0.0199                              | 0.0229                              | 0.0239                              | 0.0257                              |
| Final <i>R</i> <sub>1</sub> values ( <i>I</i> > 2σ( <i>I</i> ))               | 0.0379                              | 0.0377                              | 0.0639                              | 0.0640                              | 0.0600                              |
| Final <i>wR</i> ( <i>F</i> <sup>2</sup> ) values ( <i>I</i> > 2σ( <i>I</i> )) | 0.0826                              | 0.0836                              | 0.1349                              | 0.1338                              | 0.1346                              |
| Final <i>R</i> <sub>1</sub> values (all data)                                 | 0.0465                              | 0.0461                              | 0.0850                              | 0.0857                              | 0.0836                              |
| Final <i>wR</i> ( <i>F</i> <sup>2</sup> ) values (all data)                   | 0.0887                              | 0.0890                              | 0.1485                              | 0.1463                              | 0.1517                              |

ijf1029: The crystal contained a disordered mixture of **3** and [2+2] photo-dimer, **4**. The ratio of these compounds refined to 0.340:0.660(4). The ADP of the following pairs of atoms were constrained to be equal: O1 O1A, C1A C1, C2 C2A, C3A C3, C4A C4, C5A C5, C6A C6, C9A C9, C12A C12, C13A C13, C14A C14, C15A C15, C16A C16, C17A C17. The ADP of the following atoms were restrained to be isotropic C1 C1A C6 C6A C7 C7A C8 C8A O1 O1A. Rigid bond restraints were applied to C10-C11, C7-C8 & C7A-C8A. Two phenyl rings (C12-C17 & C12A-C17A) were constrained as regular hexagons with a C-C bond length of 1.39 Å.

ijf1030: The crystal contained a disordered mixture of **3** and [2+2] photo-dimer, **4**. The ratio of these compounds refined to 0.293:0.707(3). The ADP of the following pairs of atoms were constrained to be equal: O1 O1A, C1A C1, C2 C2A, C3A C3, C8a C8, C9A C9, C12A C12, C14A C14, C15A C15, C16A C16, C17A C17. The ADP of the following atoms were restrained to be isotropic C11 C13 C13A. The bond lengths of C10-C11 & C10A-C11A were restrained to be equal. The bond lengths of C11-C12 & C11A-C12A were restrained to be equal. Two phenyl rings (C12-C17 & C12A-C17A) were constrained to be regular hexagons with a C-C bond length of 1.39 Å.

ijf1038: The crystal contained a disordered mixture of **3** and [2+2] photo-dimer **4**. The ratio of these

compounds refined to 0.752:0.248(2) (occupancy). The ADP of the following pairs of atoms were constrained to be equal: O1 O1A, C1A C1, C2 C2A, C3A C3, C4A C4, C6A C6, C7 C7A, C8 C8A, C9A C9, C10, C10A, C11 C11A, C12A C12, C13A C13, C14A C14, C15A C15, C16A C16, C17A C17. The ADP of the following atoms were restrained to be isotropic C9 C9A. The bond lengths C10-C11 & C10A-C11A were restrained to be equal. The bond lengths C11-C12 & C11A-C12A were restrained to be equal. Two phenyl rings (C12-C17 & C12A-C17A) were constrained to be regular hexagons with a C-C bond length of 1.39 Å.

### 3.3 Powder XRD experiments (carried out at Durham University)

Powder X-ray diffraction data were collected on a Bruker D8 powder diffractometer using Cu K $\alpha_{1,2}$  radiation ( $\lambda = 1.5406$  Å). Data were collected at 300 K ( $2\theta = 0-35^\circ$ ) using an Oxford Cryostream PheniX to maintain the temperature over the run.

The samples for the PXRD experiments were prepared as follows. Compound **3** was obtained by crystallisation from CH<sub>2</sub>Cl<sub>2</sub>:Et<sub>2</sub>O (1:3, *v/v*) and ground to a fine powder using a pestle and mortar, and the material sieved (120  $\mu$ m) onto a zero background silicon disc coated in Vaseline. An initial PXRD scan was obtained in the dark. The sample was then irradiated using a Xenon lamp (Bentham 150W Xe lamp, model IL7), whilst recording the PXRD data.

The diffraction data were analysed using Rietveld refinements to follow the changing composition of the powdered sample. A total of 28 parameters were refined in each sequential range: 4 cell parameters and a scale factor for **3**; 4 cell parameters and a scale factor for **4**; an overall peak shape function (with 4 parameters) was allowed to refine across the 77 data ranges; 12 coefficients of a Chebychev polynomial were used to describe the background, a sample height correction and 1 parameter to describe axial divergence. ADPs were extracted and then fixed from a refinement of the model against the single crystal *hkl* data. Both compounds showed significant preferred orientation in the microcrystalline state; this was modelled using an 8<sup>th</sup> order spherical harmonic function refined and fixed in range 1 and 77 for materials **3** and **4** respectively. To obtain accurate quantification of phase percentages while using the spherical harmonic corrections, an appropriate scaling term was derived from ranges 1 and 77 for each of the phases. This was then fixed for other powder patterns.

These protocols gave good fits to data over the whole time range; parameters did not correlate significantly with the unit-cell parameters. All refinements were performed using the Topas Academic software suite controlled by local routines.<sup>12</sup>

The refined lattice parameters are given in the following graphs. Limits were placed on refining lattice parameters to ensure they did not change significantly from their known values. This is essential in the first

few ranges where **4** is not present to any significant quantity, as refinement of the lattice parameters away from their expected values could lead to false percentage information. The large error bars on the lattice parameters of **4** at the beginning and **3** at the end of the experiment arise as the precision decreases during the refinement when the material is present in smaller amounts.

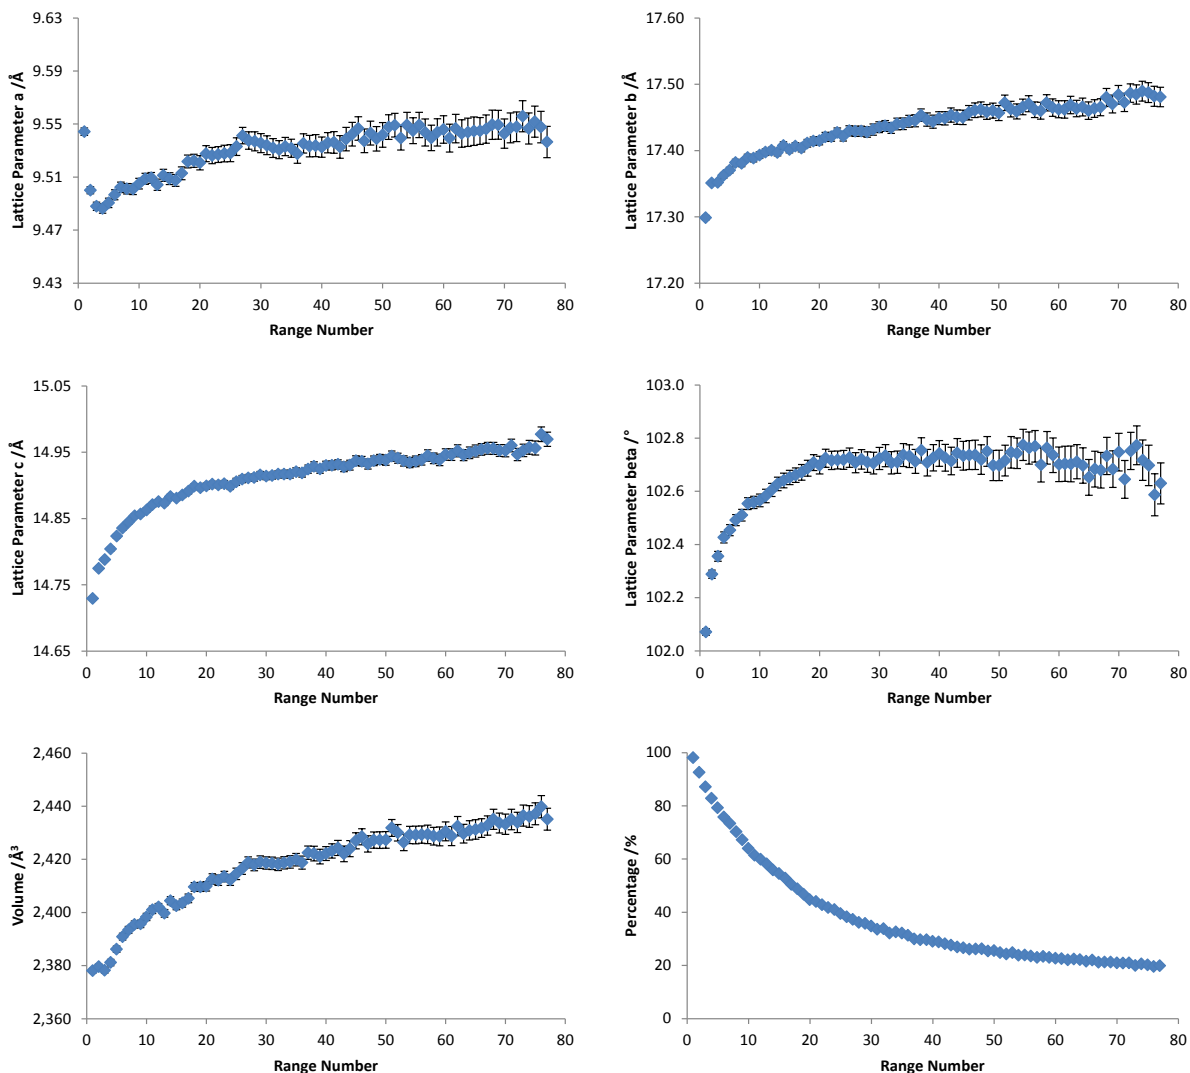

**Figure 1.** Refined lattice parameters for **3** over the 20 hour powder experiment performed at 300 K (note: the lattice parameters likely increase during the experiment due to strain broadening).

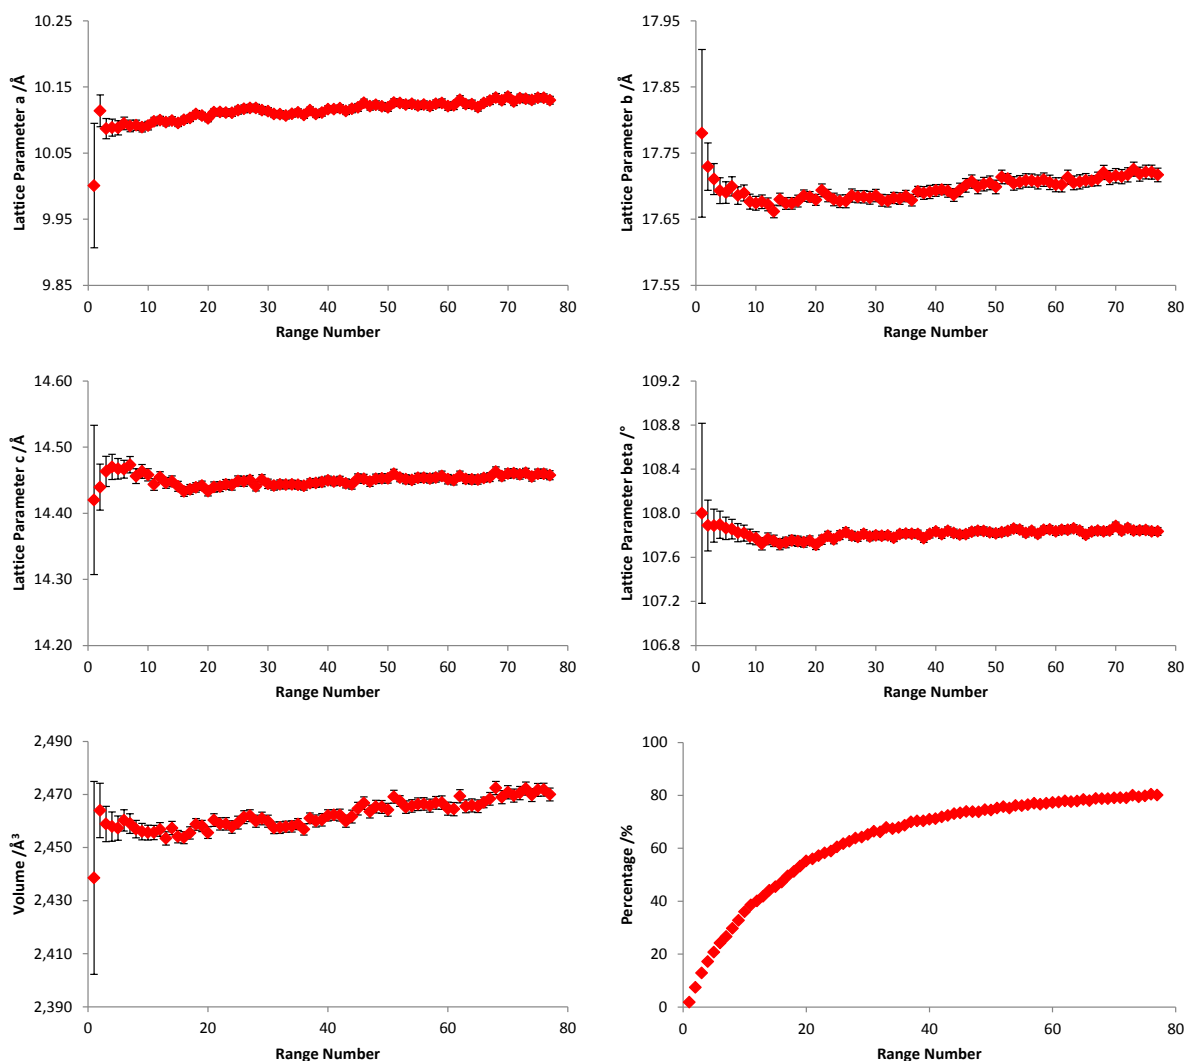

**Figure 2.** Refined lattice parameters for **4** over the 20 hour powder experiment performed at 300 K.

### 3.4 Solid-state NMR spectroscopic experiments

This study was carried out with the assistance of the EPSRC Solid-State NMR service at Durham University:

One batch of **3** (200 mg) was irradiated using a Xenon lamp (Bentham 150W Xe lamp, model IL7) and agitating the mixture every 30 min. After 2.5 h and 5 h samples (100 mg) were removed from the light for solid-state <sup>13</sup>C NMR spectroscopic analysis. A second batch was irradiated in the same manner for 43 h. The samples were submitted to the Durham Solid-State Research Service for analysis. The spectra were obtained on a Varian VNMRs spectrometer operating at 161.87 MHz (spin rate = 10000 Hz) for <sup>31</sup>P and 100.56 MHz (spin rate = 6800 Hz) for <sup>13</sup>C. A 4 mm probe was used for the <sup>31</sup>P measurements and a 6 mm probe for the <sup>13</sup>C. In the <sup>13</sup>C measurements the conditions used put a sideband over the ketone signal, so a TOSS sideband

suppression experiment was used to reveal the ketone signal. Spectral referencing is with respect to 85% H<sub>3</sub>PO<sub>4</sub> or neat trimethylsilane. All the spectra were obtained with a 120s recycle delay.

**Compound 3:** <sup>13</sup>C CPMAS NMR δ 188.6, 143.4, 139.7, 136.3, 131.9, 131.1, 129.7, 128.8, 127.6, 126.1, 121.5; Quaternary carbon environments were found by TPPM decoupling experiments δ 188.6 (C=O), 136.3, 132.4, 132.0, 129.6, 128.9; <sup>31</sup>P CPMAS NMR δ 39.82.

**2.5 h:** <sup>13</sup>C CPMAS NMR δ 197.2, 188.8, 186.3, 143.2, 138.9, 136.2, 131.2, 129.7, 126.8, 122.1, 54.2, 37.8; <sup>31</sup>P CPMAS NMR δ 39.86 (br, ΔV<sub>1/2</sub> = 1.95 ppm).

**5 h:** <sup>13</sup>C CPMAS NMR δ 197.4, 195.6, 186.2, 143.4, 138.8, 136.3, 131.3, 129.6, 126.9, 122.1, 53.2, 37.9; Quaternary carbon environments were found by TPPM decoupling experiments δ 197.4 (C=O), 195.7 (C=O), 188.9 (C=O), 186.1 (C=O), 143.4, 136.3, 134.2, 133.7, 131.7, 129.7; <sup>31</sup>P CPMAS NMR δ 43.19 (s), 40.18 (br s with a shoulder).

**43 h ([2+2] Photo-dimer 4):** <sup>13</sup>C CPMAS δ 195.7, 147.4, 143.5, 142.8, 141.5, 139.1, 134.3, 131.9, 130.6, 129.1, 125.1, 53.9, 37.4; Quaternary carbon environments were found by TPPM decoupling experiments δ 195.6 (C=O), 147.5, 142.8, 134.3, 130.5, 129.4; <sup>31</sup>P CPMAS δ 43.22 (s), 41.76 (br s with a shoulder).

### 3.5 Solution-state *in situ* laser NMR spectroscopic experiments

This study was conducted with the assistance of Professor Simon Duckett and Mr. John Clarke (University of York). <sup>1</sup>H and <sup>31</sup>P NMR spectroscopy was carried out on a Bruker DRX 400 Advance fitted with an *in-situ* 325 nm cw 25 mW He-Cd laser as a light source.<sup>13</sup> Samples of **3** in CD<sub>2</sub>Cl<sub>2</sub> (0.07 and ~0.25 M) were irradiated for 18 h at 298 K, whilst <sup>1</sup>H and <sup>31</sup>P NMR spectra were obtained every 20 minutes.

**Compound 3 (0.25 M):** <sup>1</sup>H NMR (400 MHz, CD<sub>2</sub>Cl<sub>2</sub>) δ 8.43 (d, *J* = 16.0 Hz, 1H), 7.99-7.72 (m, 5H), 7.70-7.38 (m, 13H), 7.33 (apparent t, *J* = 7.0 Hz, 1H), 7.09 (dd, *J* = 14.5, 8.0 Hz, 1H), 6.92 (d, *J* = 16.0 Hz, 1H), 6.63 (d, *J* = 16.0 Hz, 1H); <sup>31</sup>P NMR (162 MHz, CD<sub>2</sub>Cl<sub>2</sub>) δ 41.11 (s).

**10 h (0.25 M):** <sup>1</sup>H NMR (400 MHz, CD<sub>2</sub>Cl<sub>2</sub>) δ 8.43 (d, *J* = 16.0 Hz, 1H), 8.30 (d, *J* = 16.0 Hz, 0.1H), 7.93-7.75 (m, 5.5H), 7.70-7.21 (m, 14.4H), 7.09 (dd, *J* = 14.5, 8.0 Hz, 1.1H), 6.92 (d, *J* = 16.0 Hz, 1H), 6.77 (d, *J* = 12.5 Hz, 0.1H), 6.63 (d, *J* = 16.0 Hz, 1H), 6.38 (d, *J* = 16.0 Hz, 0.1H), 6.05 (d, *J* = 12.5 Hz, 0.1H); <sup>31</sup>P NMR (162 MHz, CD<sub>2</sub>Cl<sub>2</sub>) δ 41.11 (s, 1P), 40.89 (s, 0.1P).

Compound **3** (**0.07 M**):  $^1\text{H}$  NMR (400 MHz,  $\text{CD}_2\text{Cl}_2$ )  $\delta$  8.39 (d,  $J = 16.0$  Hz, 1H), 7.88-7.69 (m, 5H), 7.64-7.38 (m, 13H), 7.32 (ddd,  $J = 7.5, 5.0, 1.5$  Hz, 1H), 7.06 (ddd,  $J = 14.5, 8.0, 2.0$  Hz, 1H), 6.89 (d,  $J = 16.0$  Hz, 1H), 6.60 (d,  $J = 16.0$  Hz, 1H);  $^{31}\text{P}$  NMR (162 MHz,  $\text{CD}_2\text{Cl}_2$ )  $\delta$  41.09 (s).

**1h** (**0.07 M**):  $^1\text{H}$  NMR (400 MHz,  $\text{CD}_2\text{Cl}_2$ )  $\delta$  8.40 (d,  $J = 16.0$  Hz, 1H), 7.90-7.75 (m, 5.9H), 7.62-7.38 (m, 16.3H), 7.37-7.20 (m, 2.8H), 7.13-6.99 (m, 1.3H), 6.89 (d,  $J = 16.0$  Hz, 1H), 6.60 (d,  $J = 16.0$  Hz, 1H), 6.52 (d,  $J = 16.0$  Hz, 0.3H), 6.09 (d,  $J = 12.0$  Hz, 0.3H);  $^{31}\text{P}$  NMR (162 MHz,  $\text{CD}_2\text{Cl}_2$ )  $\delta$  41.13 (s, 0.3P), 41.09 (s, 1P).

**15 h** (**0.07 M**):  $^1\text{H}$  NMR (400 MHz,  $\text{CD}_2\text{Cl}_2$ )  $\delta$  8.40 (d,  $J = 16.0$  Hz, 1H), 8.27 (d,  $J = 16.0$  Hz, 0.2H), 7.90-7.75 (m, 6H), 7.62-7.38 (m, 15H), 7.37-7.22 (m, 1.6H), 7.13-7.00 (m, 1.2H), 6.89 (d,  $J = 16.0$  Hz, 1H), 6.76 (d,  $J = 12.5$  Hz, 0.2H), 6.60 (d,  $J = 16.0$  Hz, 1H), 6.36 (d,  $J = 16.0$  Hz, 0.2H), 6.03 (d,  $J = 12.5$  Hz, 0.2H);  $^{31}\text{P}$  NMR (162 MHz,  $\text{CD}_2\text{Cl}_2$ )  $\delta$  41.09 (s, 1P), 40.87 (s, 0.2P).

#### 4. NMR spectra for compounds **3** and **4**

##### Compound **3**

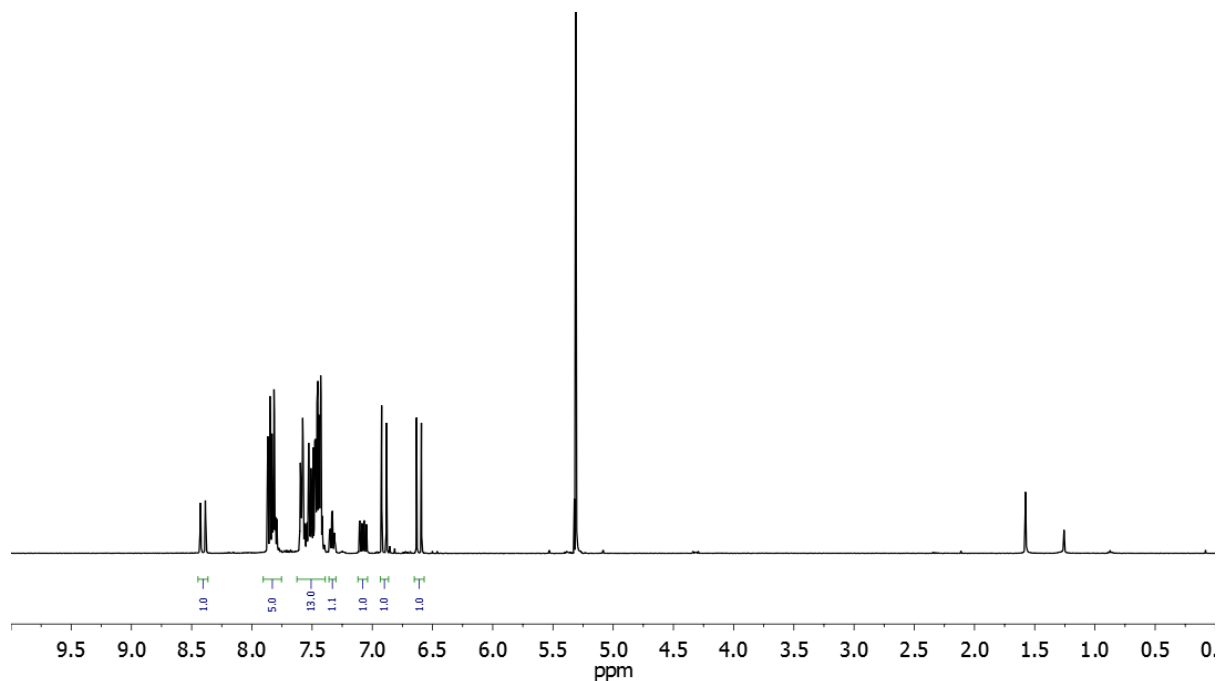

Figure 3.  $^1\text{H}$  NMR spectrum of **3** (400 MHz,  $\text{CD}_2\text{Cl}_2$ ).

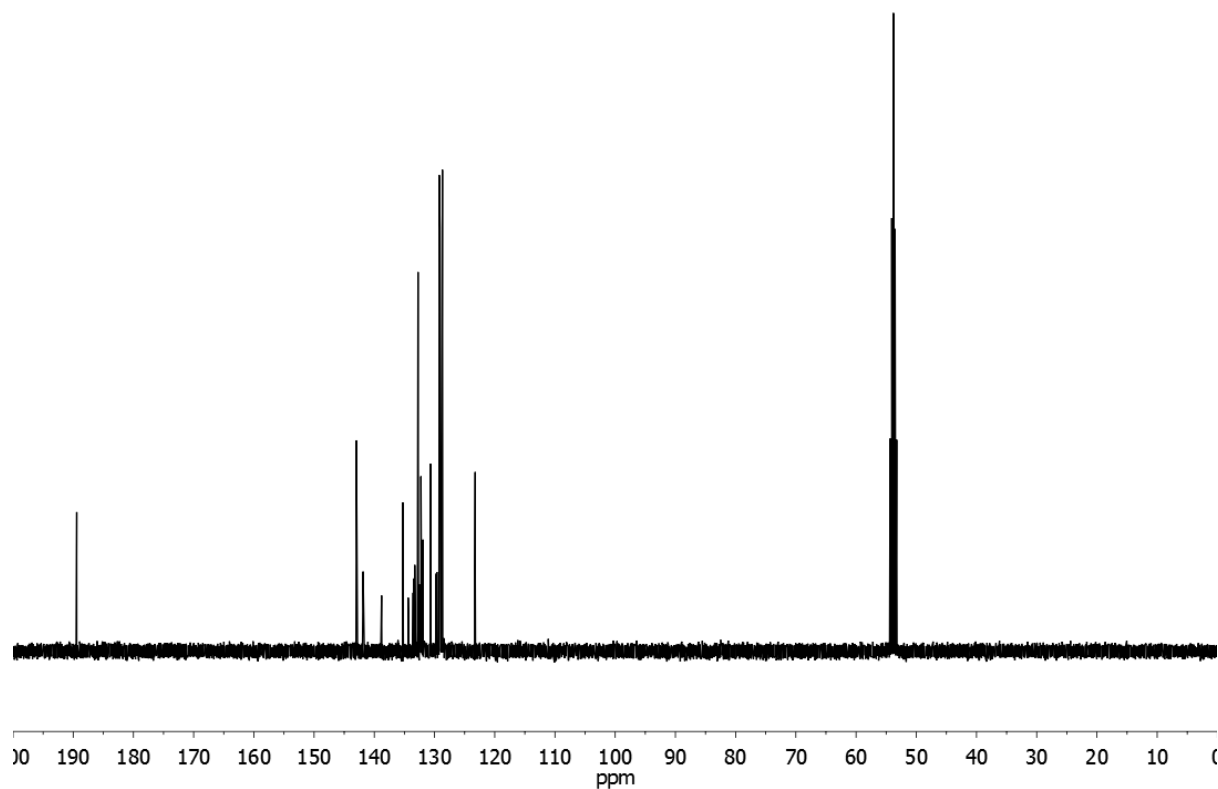

**Figure 4.**  $^{13}\text{C}$  NMR spectrum of **3** (100 MHz,  $\text{CD}_2\text{Cl}_2$ ).

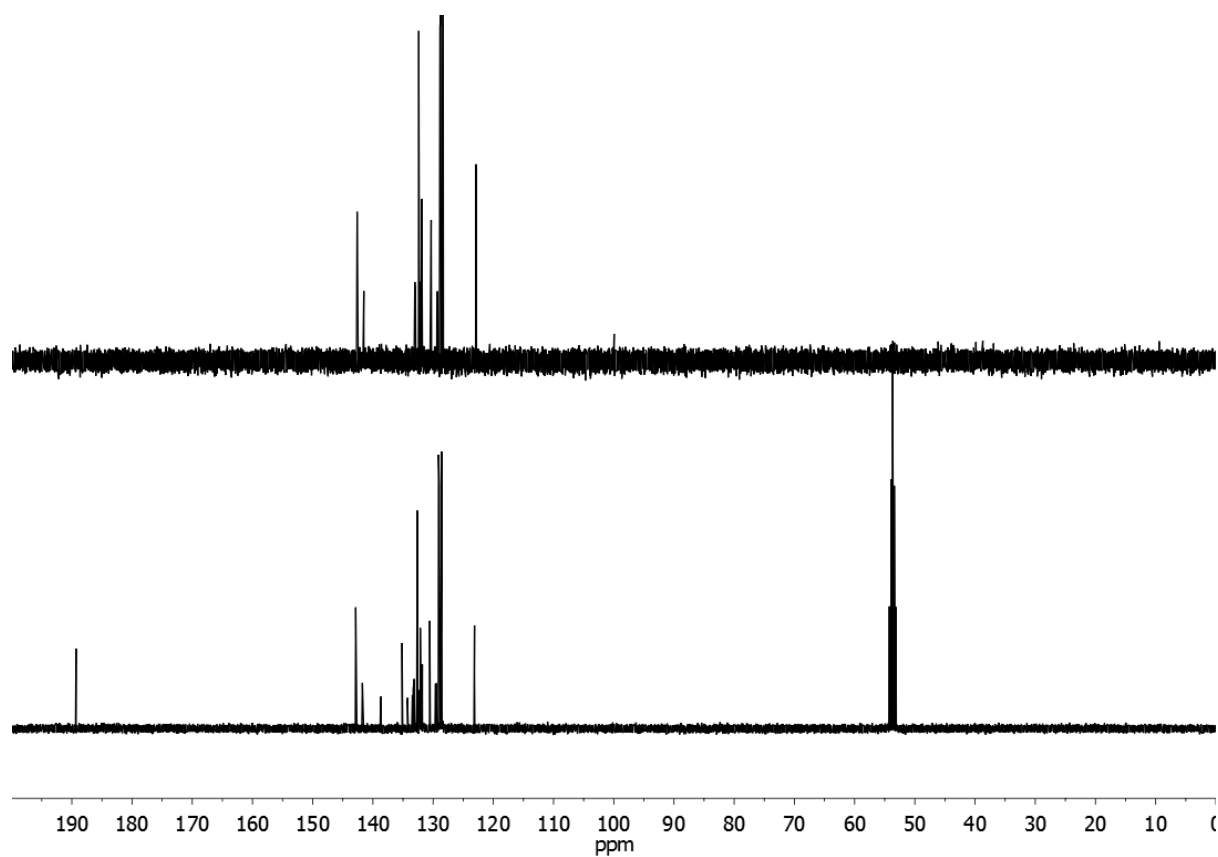

**Figure 5.**  $^{13}\text{C}$  DEPT NMR spectrum of **3** (100 MHz,  $\text{CD}_2\text{Cl}_2$ ).



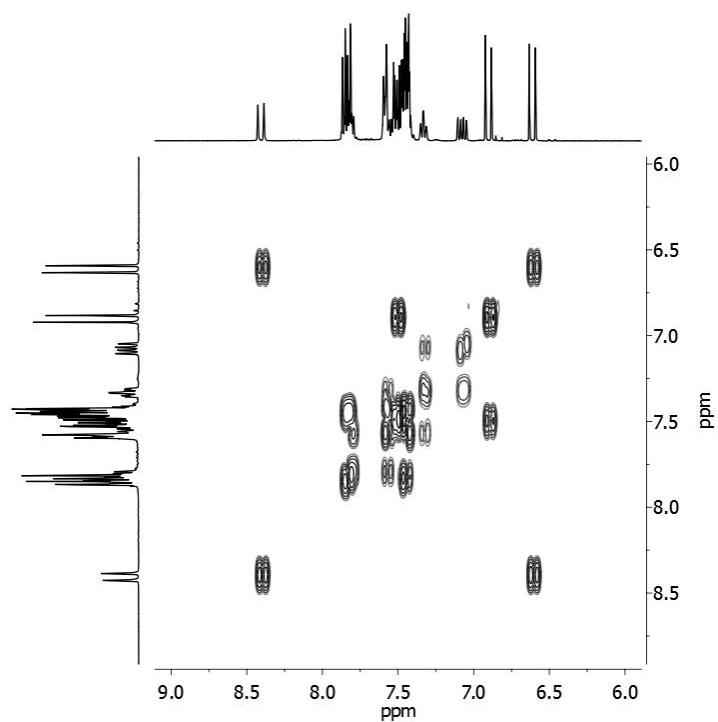

**Figure 6.**  $^1\text{H}$  COSY NMR spectrum of **3** (400 MHz,  $\text{CD}_2\text{Cl}_2$ ).

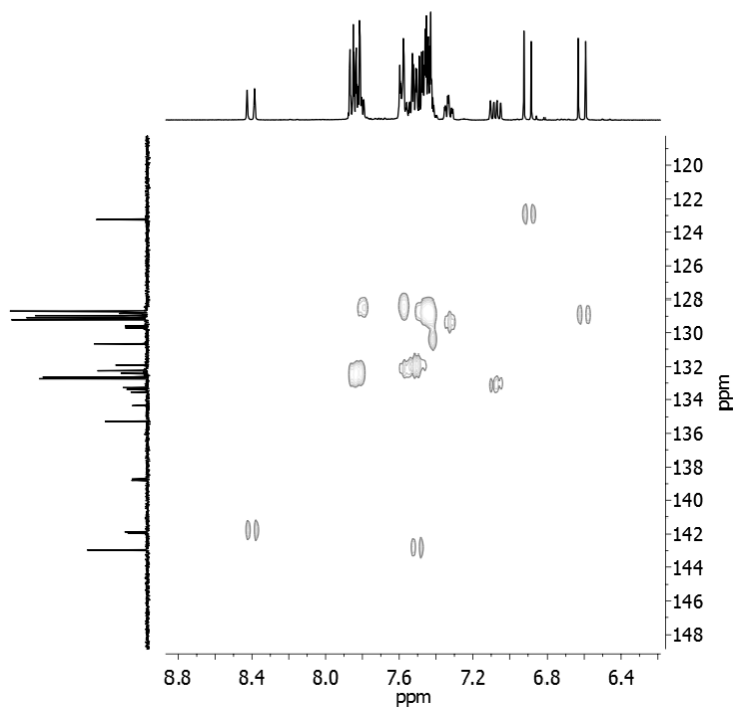

**Figure 7.**  $^1\text{H}$ - $^{13}\text{C}$  HSQC NMR spectrum of **3** (400 MHz,  $\text{CD}_2\text{Cl}_2$ ).

[2+2] cycloaddition product **4**

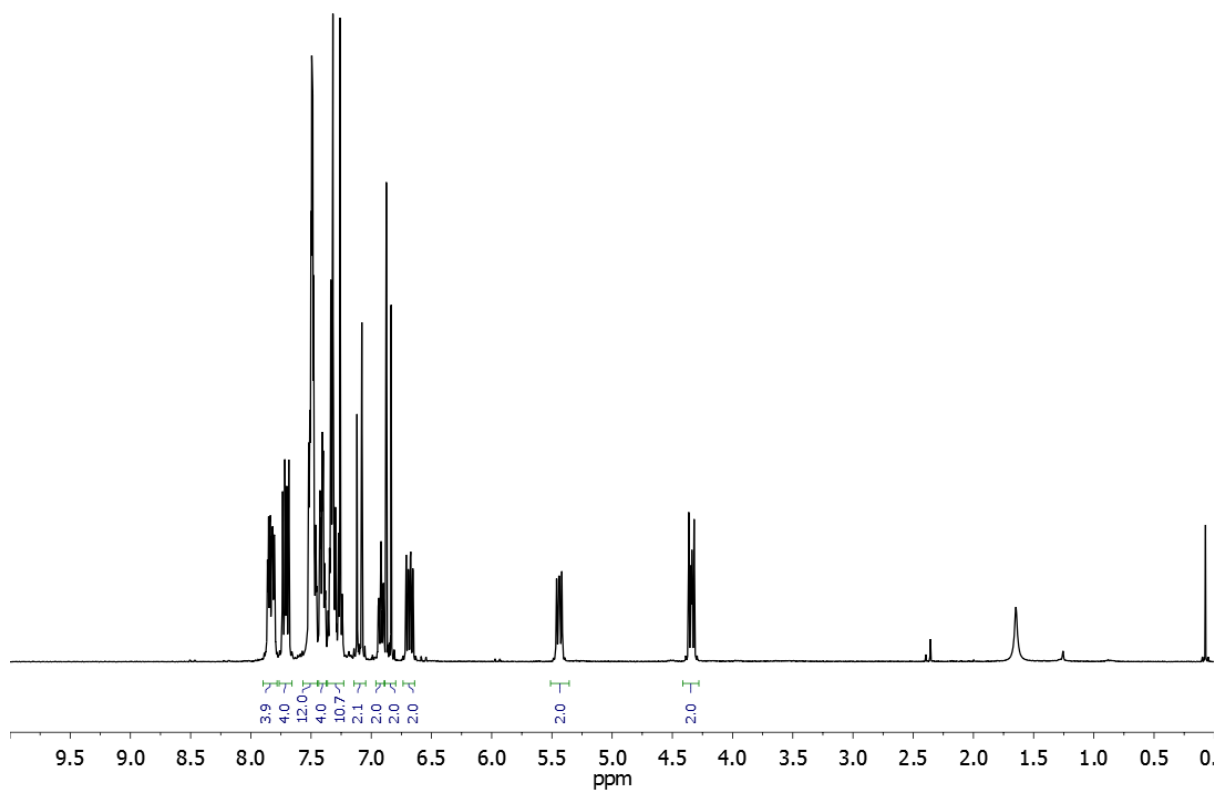

**Figure 8.** <sup>1</sup>H NMR spectrum of **4** (400MHz, CDCl<sub>3</sub>).

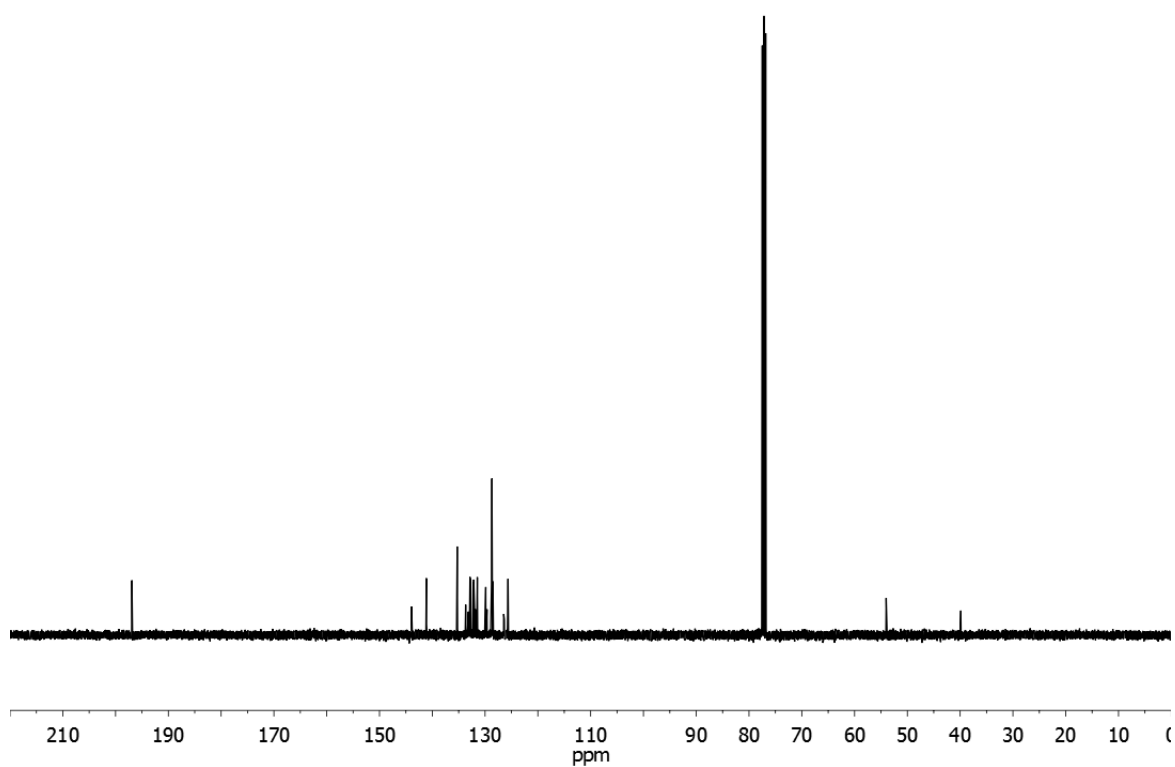

**Figure 9.** <sup>13</sup>C NMR spectrum of **4** (100 MHz, CDCl<sub>3</sub>).

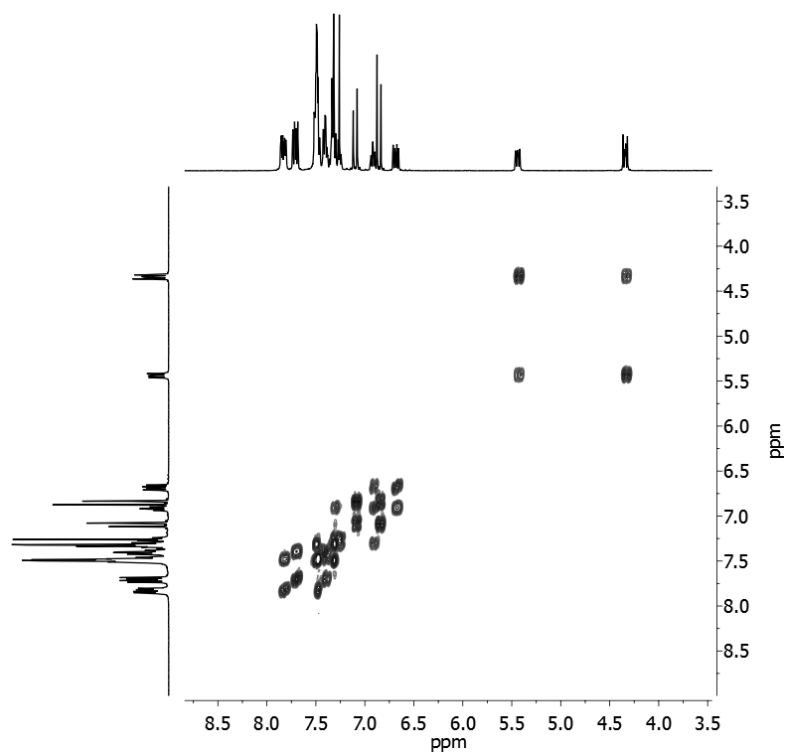

**Figure 10.**  $^1\text{H}$  COSY NMR spectrum of **4** (400MHz,  $\text{CDCl}_3$ ).

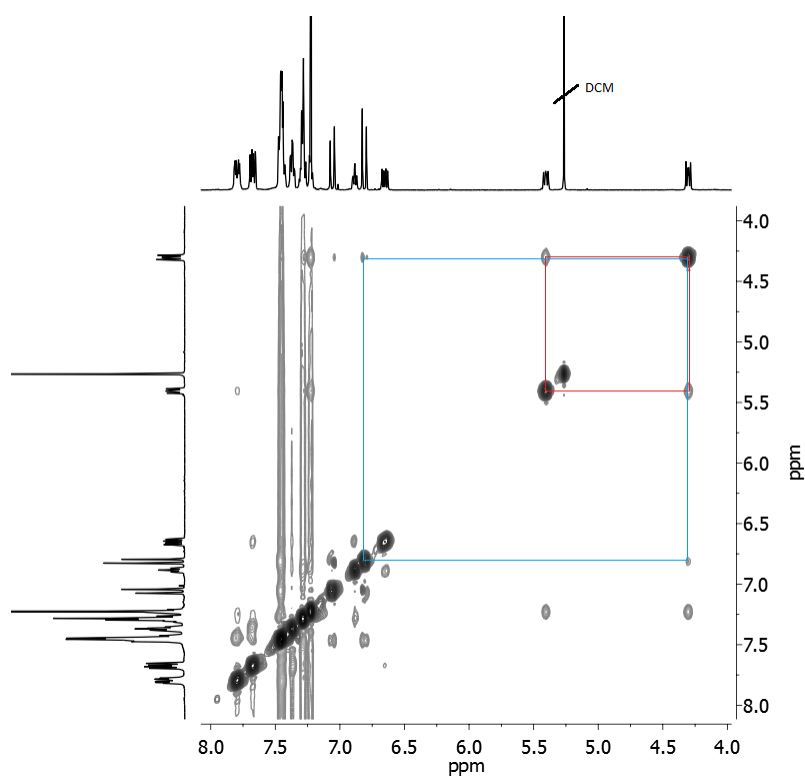

**Figure 11.**  $^1\text{H}$  NOESY NMR spectrum of **4** (400 MHz,  $\text{CDCl}_3$ ).

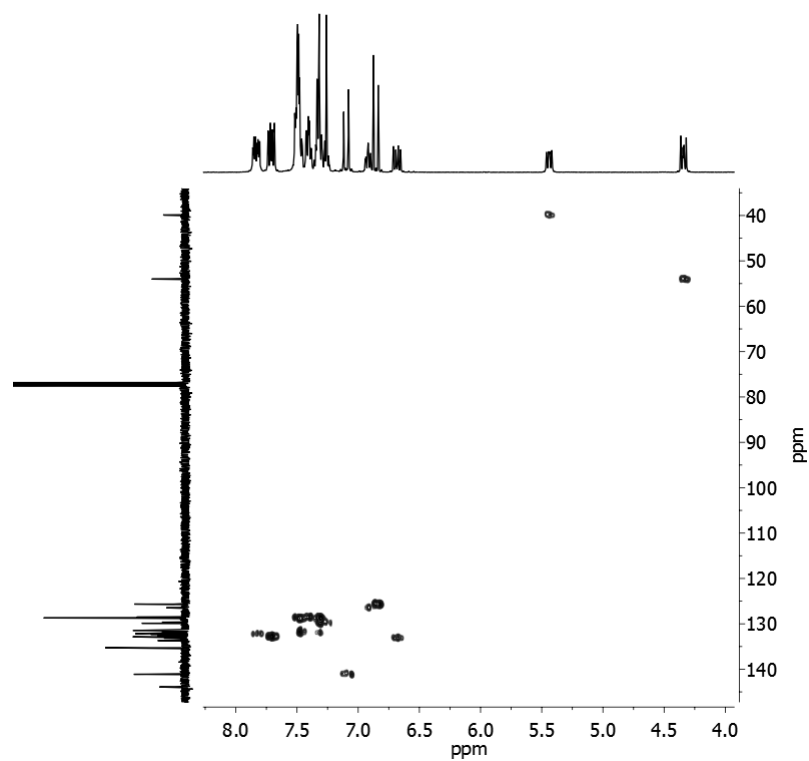

Figure 12.  $^1\text{H}$ - $^{13}\text{C}$  HSQC NMR spectrum of **4** (400 MHz,  $\text{CDCl}_3$ ).

### 5. UV-vis spectroscopic data for compound **3**

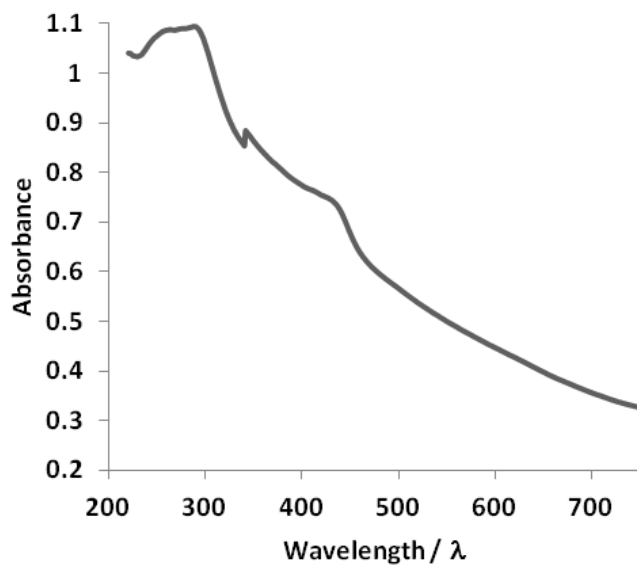

Figure 13. UV-vis spectrum of compound **3** (recrystallised in the dark) in the solid-state.

## 6. References

---

1. A. Maraval, G. Magro, V. Maraval, L. Vendier, A. M. Caminde and J. –P. Majoral, *J. Organomet. Chem.*, 2006, **691**, 1333-1340.
2. a) N. G. Clemo, D. R. Gedge and G. Pattenden, *J. Chem. Soc., Perkin Trans. I*, 1981, 1448-1453. b) X. –C. Li, D. Ferreira, M. R. Jacob, Q. Zhang, S. I. Khan, H. N. ElSohly, D. G. Nagle, T. J. Smillie, I. A. Khan, L. A. Walker and A. M. Clark, *J. Am. Chem. Soc.*, 2004, **126**, 6872-6873.
3. Smart diffractometer control software (v5,625), Bruker-AXS, Bruker AXS GmbH, Karlsruhe, Germany.
4. Saint+ (v6.22) Bruker AXS, Bruker AXS GmbH, Karlsruhe, Germany.
5. Sheldrick, G. M. SHELXS-97, Program for solution of crystal structures, University of Göttingen, Germany, 1997.
6. A similar (though not identical) process is described in reference 41.
7. CrysAlisPro, Oxford Diffraction Ltd. Version 1.171.34.40
8. Empirical absorption correction using spherical harmonics, implemented in SCALE3 ABSPACK scaling algorithm within CrysAlisPro software, Oxford Diffraction Ltd. Version 1.171.34.40
9. O. V. Dolomanov, L. J. Bourhis, R. J. Gildea, J. A. K. Howard, H. Puschmann, OLEX2: a complete structure solution, refinement and analysis program. *J. Appl. Cryst.*, 2009, **42**, 339-341, using "SHELXS-97" - program for structure solution. G. M. Sheldrick, University of Göttingen, Göttingen, Germany, 1997.
10. "SHELXL-97" - program for the Refinement of Crystal Structures. G. M. Sheldrick, University of Göttingen, Göttingen, Germany, 1997.
11. "smtbx-flip" plug-in module to "Olex2" crystallography software (ref. 9).
12. a) A. A. Coelho, Bruker AXS, Karlsruhe, 2004. b) J. S. O. Evans, Durham, 1999.
13. C. Goddard, Photochemical substitution and bond activation reactions at cyclopentadienyl rhodium: synthetic and NMR studies. PhD Thesis, York, 2003.
